# Supplementary material
Source: Springer Nature journal article supplement (https://www.springermedizin.de/resource/supplementary/12948_2005_21_MOESM1_ESM.pdf/9557038)

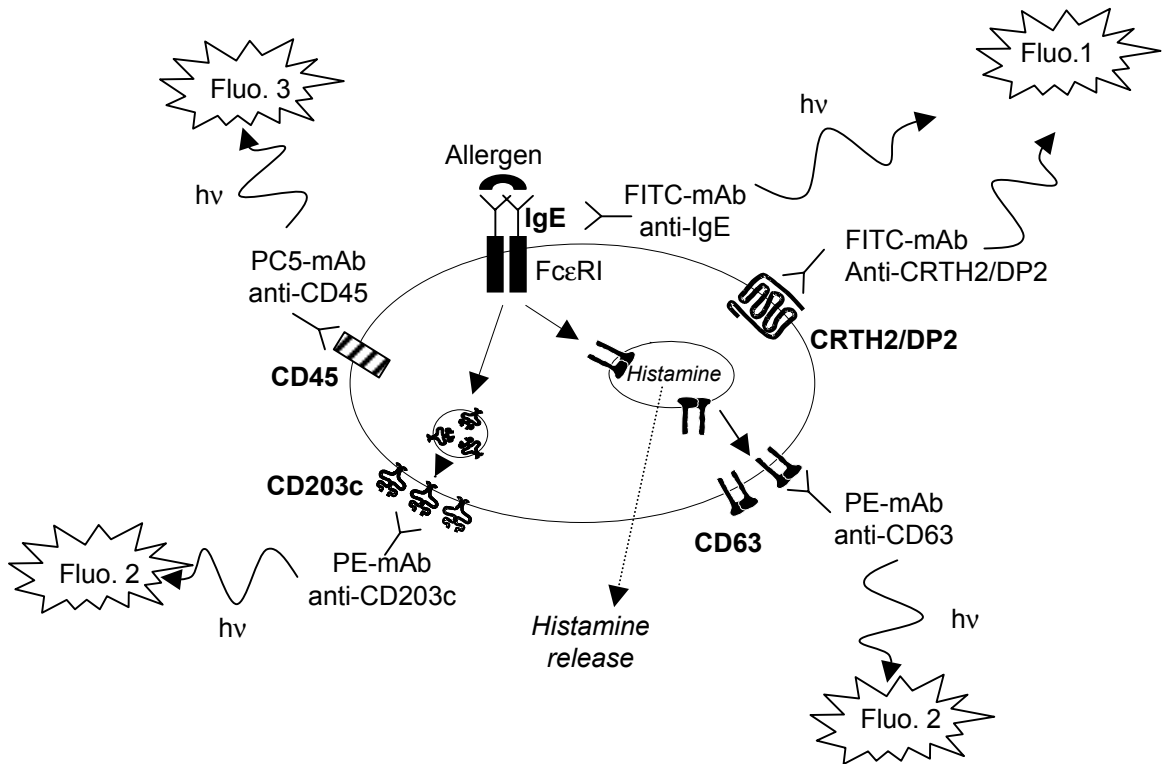

Supplement: MOESM1 [file 9557038]
